# Supplementary material for: Condemned or Not to Die? Gene Polymorphisms Associated With Cell Death in Pemphigus Foliaceus
Source: PubMed Central journal article supplement (PMC6813369; doi:10.3389/fimmu.2019.02416), 2019-10-18
Supplement: Data_Sheet_1.pdf [file Data_Sheet_1.pdf]

## Supplementary Material

Table 1: Stratified analyses between rs6075340 (A/G) of *SIRPA* and rs12695175 (T/G) of *CD47*.

|           | <i>SIRPA</i> | <i>CD47</i> | Cases          | Controls       | OR          | [95%CI]               | p             |
|-----------|--------------|-------------|----------------|----------------|-------------|-----------------------|---------------|
|           | rs6075340    | rs12695175  |                |                |             |                       |               |
| A)        |              |             | n = 88         | n = 47         |             |                       |               |
|           | A/A          | T/T         | 32             | 12             | 1.66        | [0.71 – 4.03]         | 0.2489        |
|           | G+           | G+          | 56             | 35             | 0.60        | [0.24 – 1.39]         |               |
| <b>B)</b> |              |             | <b>n = 138</b> | <b>n = 146</b> |             |                       |               |
|           | A/A          | G+          | <b>15</b>      | <b>5</b>       | <b>3.42</b> | <b>[1.14 – 12.39]</b> | <b>0.0190</b> |
|           | G+           | T/T         | <b>123</b>     | <b>141</b>     | <b>0.29</b> | <b>[0.08 – 0.87]</b>  |               |
| C)        |              |             | n = 173        | n = 172        |             |                       |               |
|           | A/A          | G/G         | 2              | 0              | -           | -                     | 0.4986        |
|           | G+           | T+          | 171            | 172            | -           | -                     |               |
| D)        |              |             | n = 53         | n = 21         |             |                       |               |
|           | A/A          | T+          | 45             | 17             | 1.31        | [0.25 – 5.74]         | 0.7314        |
|           | G+           | G/G         | 8              | 4              | 0.75        | [0.17 – 3.89]         |               |
| E)        |              |             | n = 117        | n = 99         |             |                       |               |
|           | A+           | T/T         | 95             | 86             | 0.65        | [0.28 – 1.45]         | 0.2734        |
|           | G/G          | G+          | 22             | 13             | 1.52        | [0.68 – 3.52]         |               |
| <b>F)</b> |              |             | <b>n = 109</b> | <b>n = 94</b>  |             |                       |               |
|           | A+           | G+          | <b>49</b>      | <b>27</b>      | <b>2.02</b> | <b>[1.08 – 3.81]</b>  | <b>0.0202</b> |
|           | G/G          | T/T         | <b>60</b>      | <b>67</b>      | <b>0.49</b> | <b>[0.26 – 0.92]</b>  |               |
| G)        |              |             | n = 88         | n = 82         |             |                       |               |
|           | A+           | G/G         | 8              | 3              | 2.61        | [0.60 – 15.88]        | 0.2144        |
|           | G/G          | T+          | 80             | 79             | 0.38        | [0.06 – 1.66]         |               |
| H)        |              |             | n = 138        | n = 111        |             |                       |               |
|           | A+           | T+          | 136            | 110            | 0.61        | [0.01 – 12.04]        | 1.0           |
|           | G/G          | G/G         | 2              | 1              | 1.61        | [0.08 – 96.23]        |               |

In bold: significant (Fisher exact test). Fisher exact test was performed using the online web statistical calculator Astasa [[www.astatsa.com](http://www.astatsa.com)]. OR: Odds Ratio. CI: Confidence interval. SNP: single nucleotide polymorphisms.

Table 2: Stratified analyses between 10781522 (A/G) of *TRAF2* and rs1800630 (A/C) of *TNF*.

|    | <i>TRAF2</i> | <i>TNF</i> | Cases                                    | Controls                                  | OR                         | [95%CI]                                       | p                 |
|----|--------------|------------|------------------------------------------|-------------------------------------------|----------------------------|-----------------------------------------------|-------------------|
|    | rs10781522   | rs1800630  |                                          |                                           |                            |                                               |                   |
| A) | A/A<br>G+    | A/A<br>C+  | n = 129<br>4<br>125                      | n = 145<br>4<br>141                       | 1.12<br>0.88               | [0.20 – 6.18]<br>[0.16 – 4.86]                | 1.0               |
| B) | A/A<br>G+    | C+<br>A/A  | n = 94<br>84<br>10                       | n = 49<br>46<br>3                         | 0.54<br>1.81               | [0.09 – 2.28]<br>[0.43 – 10.79]               | 0.5428            |
| C) | A/A<br>G+    | C/C<br>A+  | n = 115<br>50<br>65                      | n = 80<br>38<br>42                        | 0.85<br>1.17               | [0.46 – 1.57]<br>[0.63 – 2.17]                | 0.6610            |
| D) | A/A<br>G+    | A+<br>C/C  | <b>n = 108</b><br><b>38</b><br><b>70</b> | <b>n = 114</b><br><b>12</b><br><b>102</b> | <b>4.58</b><br><b>0.21</b> | <b>[2.16 – 10.34]</b><br><b>[0.09 – 0.46]</b> | <b>&lt;0.0001</b> |
| E) | A+<br>G/G    | A/A<br>C+  | n = 42<br>11<br>31                       | n = 52<br>6<br>46                         | 2.69<br>0.37               | [0.81 – 9.84]<br>[0.10 – 1.23]                | 0.1044            |
| F) | A+<br>G/G    | C+<br>A/A  | n = 181<br>178<br>3                      | n = 142<br>141<br>1                       | 0.42<br>2.37               | [0.01 – 5.31]<br>[0.18 – 125.54]              | 0.6336            |
| G) | A+<br>G/G    | C/C<br>A+  | n = 126<br>106<br>20                     | n = 125<br>109<br>16                      | 0.77<br>1.28               | [0.35 – 1.67]<br>[0.59 – 2.80]                | 0.5896            |
| H) | A+<br>G/G    | A+<br>C/C  | <b>n = 97</b><br><b>83</b><br><b>14</b>  | <b>n = 69</b><br><b>38</b><br><b>31</b>   | <b>4.78</b><br><b>0.20</b> | <b>[2.18 – 10.94]</b><br><b>[0.09 – 0.45]</b> | <b>&lt;0.0001</b> |

In bold: significant (Fisher exact test). Fisher exact test was performed using the online web statistical calculator Astasa [www.astatsa.com]. OR: Odds Ratio. CI: Confidence interval. SNP: single nucleotide polymorphisms.
